# Supplementary material
Source: PubMed Central journal article supplement (PMC1174854)
Supplement: cmaj_173_2_153__1.pdf [file cmaj_173_2_153__1.pdf]

**e-Table 3: Provincial variations in the proportions of respondents who perceived that their health priorities were being addressed by health care providers (unabridged)\***

| Health priority                                | Province; % of respondents perceiving that health priority was being addressed† |                   |                    |                     |                         |                    |                             |
|------------------------------------------------|---------------------------------------------------------------------------------|-------------------|--------------------|---------------------|-------------------------|--------------------|-----------------------------|
|                                                | Atlantic provinces‡<br>n = 203                                                  | Quebec<br>n = 603 | Ontario<br>n = 927 | Manitoba<br>n = 128 | Saskatchewan<br>n = 156 | Alberta<br>n = 230 | British Columbia<br>n = 322 |
| <b>Health condition</b>                        |                                                                                 |                   |                    |                     |                         |                    |                             |
| Osteoporosis                                   | 46.6                                                                            | 61.1              | 58.7               | 59.8                | 57.4                    | 65.5               | 52.7                        |
| Falls                                          | 18.9                                                                            | 28.7              | 19.4               | 19.5                | 15.9                    | 18.9               | 15.2                        |
| Stroke                                         | 94.1                                                                            | 97.3              | 96.7               | 96.9                | 94.2                    | 95.6               | 93.1                        |
| Alzheimer's disease                            | 7.4                                                                             | 10.4              | 11.1               | 11.0                | 8.8                     | 10.8               | 8.9                         |
| Heart disease                                  | 95.5                                                                            | 98.0              | 97.7               | 96.9                | 94.8                    | 96.9               | 93.4                        |
| Hip fracture                                   | 46.8                                                                            | 57.1              | 65.9               | 41.2                | 37.4                    | 72.0               | 39.8                        |
| Colon cancer                                   | 33.0                                                                            | 34.1              | 39.6               | 55.1                | 44.4                    | 41.3               | 42.1                        |
| Breast cancer                                  | 74.4                                                                            | 86.7              | 84.3               | 88.0                | 88.2                    | 84.1               | 89.4                        |
| Diabetes                                       | 74.8                                                                            | 85.7              | 79.9               | 83.2                | 75.2                    | 76.3               | 71.3                        |
| Pneumonia                                      | 74.1                                                                            | 76.0              | 89.2               | 81.8                | 76.7                    | 78.4               | 80.7                        |
| <b>Functioning</b>                             |                                                                                 |                   |                    |                     |                         |                    |                             |
| Memory problems                                | 6.8                                                                             | 14.5              | 11.4               | 10.6                | 8.6                     | 5.9                | 9.4                         |
| Vision loss                                    | 48.4                                                                            | 46.4              | 45.3               | 48.0                | 42.3                    | 41.8               | 39.1                        |
| Loss of muscle strength                        | 22.4                                                                            | 34.6              | 29.9               | 28.2                | 23.8                    | 24.3               | 25.0                        |
| Pain control                                   | 37.6                                                                            | 44.4              | 49.2               | 43.9                | 39.7                    | 43.0               | 42.4                        |
| Urinary incontinence                           | 19.8                                                                            | 28.8              | 23.2               | 19.7                | 30.0                    | 24.5               | 24.4                        |
| Depression                                     | 14.8                                                                            | 19.3              | 19.1               | 15.8                | 18.6                    | 16.4               | 20.1                        |
| <b>Contextual factors</b>                      |                                                                                 |                   |                    |                     |                         |                    |                             |
| Learning about side effects of medications     | 87.8                                                                            | 86.7              | 91.7               | 91.1                | 93.4                    | 91.4               | 90.2                        |
| Being seen as a "whole person"                 | 81.9                                                                            | 86.1              | 83.4               | 83.8                | 82.5                    | 78.9               | 80.4                        |
| Spending enough time with health care provider | 70.4                                                                            | 77.3              | 75.4               | 72.4                | 78.9                    | 70.4               | 70.0                        |
| Learning what to expect from normal aging      | 29.6                                                                            | 41.7              | 35.8               | 35.4                | 32.5                    | 33.6               | 31.4                        |
| Nutrition counselling                          | 40.0                                                                            | 40.1              | 42.1               | 40.3                | 32.9                    | 36.4               | 30.5                        |
| Addressing anxieties                           | 29.5                                                                            | 46.1              | 31.1               | 38.7                | 29.9                    | 29.9               | 32.6                        |
| Counselling about social services resources    | 42.6                                                                            | 61.7              | 47.9               | 58.1                | 45.8                    | 52.9               | 45.1                        |
| End-of-life care                               | 6.0                                                                             | 12.3              | 10.7               | 10.3                | 10.3                    | 11.6               | 12.5                        |
| Exercise counselling                           | 38.6                                                                            | 39.5              | 41.3               | 44.6                | 36.4                    | 41.7               | 40.9                        |
| Counselling about community programs           | 56.4                                                                            | 55.1              | 62.8               | 63.5                | 67.1                    | 66.2               | 73.5                        |

\*A shorter, abridged version of this table appeared in print (CMAJ 2005;173[2]:153-9).

†These values are crude estimates and were not adjusted for characteristics of the respondents because there were no significant differences in the mean age or physical and mental health status of the respondents between provinces. The distribution of provinces did not differ significantly among those ranked as having the highest proportion of respondents perceiving that care was being addressed for a given health priority; it did differ significantly ( $p < 0.001$ ) among those ranked as having the lowest proportion of respondents with such a perception.

‡These include Prince Edward Island, Nova Scotia, New Brunswick, and Newfoundland and Labrador.
